# Supplementary material for: Is there a maternal blood biomarker that can predict spontaneous preterm birth prior to labour onset? A systematic review
Source: PubMed Central journal article supplement (PMC8979439; doi:10.1371/journal.pone.0265853), 2022-04-04
Supplement: pone.0265853.s003.pdf [file pone.0265853.s003.pdf]

|    |                                                 |                   |      |                                                                                                                                                                                                                                                                                                 |                                                                                                                                                                                                                                                                                                                                                                                                                                               |                                                                                          |                                                                                                     |                         |                               |                                                                              |                                                           |                                                           |              |                |                                                                                                                                                                                                                                                                                                  |                                                                                                                                                                                                               |                                                                                                                                             |                                                                                                                                                                                                                                                                                                                                                         |
|----|-------------------------------------------------|-------------------|------|-------------------------------------------------------------------------------------------------------------------------------------------------------------------------------------------------------------------------------------------------------------------------------------------------|-----------------------------------------------------------------------------------------------------------------------------------------------------------------------------------------------------------------------------------------------------------------------------------------------------------------------------------------------------------------------------------------------------------------------------------------------|------------------------------------------------------------------------------------------|-----------------------------------------------------------------------------------------------------|-------------------------|-------------------------------|------------------------------------------------------------------------------|-----------------------------------------------------------|-----------------------------------------------------------|--------------|----------------|--------------------------------------------------------------------------------------------------------------------------------------------------------------------------------------------------------------------------------------------------------------------------------------------------|---------------------------------------------------------------------------------------------------------------------------------------------------------------------------------------------------------------|---------------------------------------------------------------------------------------------------------------------------------------------|---------------------------------------------------------------------------------------------------------------------------------------------------------------------------------------------------------------------------------------------------------------------------------------------------------------------------------------------------------|
| 26 | Metabolites                                     | Considine et al.  | 2019 | Investigate the potential of metabolomic biomarker candidates for the prediction of spontaneous preterm birth in asymptomatic pregnant women at 15 and/or 20 weeks gestation                                                                                                                    | mean age 30, mean BMI 24-25, all nulliparous                                                                                                                                                                                                                                                                                                                                                                                                  | n=50 sPTB =55 TB                                                                         | women who participated in the screening for obstetric and pregnancy endpoints (SCOPE) study in Cork | 2011                    | serum                         | liquid chromatography mass spectrometry                                      | 15 and 20 weeks                                           | sPTB <37 weeks                                            | case-control | Ireland        | <ul style="list-style-type: none"> <li>bile acid metabolite</li> <li>prostaglandin metabolite</li> <li>Vitamin D metabolite</li> <li>fatty acid metabolite</li> </ul>                                                                                                                            | <ul style="list-style-type: none"> <li>Y</li> <li>Y</li> <li>Y</li> <li>Y</li> </ul>                                                                                                                          | 4 features produce a biomarker panel that predicts sPTB                                                                                     | Suggest BMI linked to biomarkers                                                                                                                                                                                                                                                                                                                        |
| 27 | Acta Obstetrica et Gynecologica Scandinavica    | Curry et al.      | 2007 | evaluate the relationship between elevated mid-pregnancy levels of maternal plasma IL2, IL6, TNF $\alpha$ , IFN $\gamma$ and GM-CSF and early, moderate and late sPTB. Additionally, sought to determine whether associations vary by pre-pregnancy BMI, maternal age, gravidity, and prior PTB | most had BMI within 18.5-24.9, mostly <35 years old, 40-50% alcohol use during pregnancy, preterms more likely to have a prior preterm delivery, spontaneous abortion, or induced abortion, and to be nulliparous and nulliparous, early or moderate preterms were more likely to be > 35 years old than controls, early preterms were more likely to be smokers than controls                                                                | n=61 early sPTB, n=278 moderate sPTB, n=334 late sPTB, n=1125 TB                         | case control nested in Danish National Birth Cohort                                                 | 1997-2002               | plasma                        | multiplex flow cytometric assay<br>linumex multianalyte profiling technology | >17 weeks                                                 | sPTB <24-29 wks, 30-33 wks, 34-36 wks, and >37 wks        | case-control | Denmark        | <ul style="list-style-type: none"> <li>IL2</li> <li>IL6</li> <li>TNF<math>\alpha</math></li> <li>IFN<math>\gamma</math></li> <li>GM-CSF</li> </ul>                                                                                                                                               | <ul style="list-style-type: none"> <li>n</li> <li>Y</li> <li>Y</li> <li>Y</li> <li>n</li> </ul>                                                                                                               | IL6 and IFN $\gamma$ association with late sPTB, but not the early or moderate sPTB                                                         | early sPTB smokers,                                                                                                                                                                                                                                                                                                                                     |
| 28 | Acta Obstetrica et Gynecologica Scandinavica    | Curry et al.      | 2009 | examine associations with 1st trimester cytokines and sPTB                                                                                                                                                                                                                                      | most had BMI within 18.5-24.9, mostly <35 years old, 40-46% alcohol use during pregnancy, preterms were more likely than terms to have had a prior preterm delivery, a prior induced abortion, be nulliparous and nulliparous and report serious medical disease, early or moderate preterms were more likely to have had a prior spontaneous abortion and be > 35 years old, moderate preterms were more likely than terms to have a BMI <25 | n=107 early sPTB, n=353 moderate sPTB, n=422 late sPTB, n=1372 TB                        | case control nested in Danish National Birth Cohort                                                 | 1997-2002               | plasma                        | multiplex flow cytometric assay<br>linumex multianalyte profiling technology | 8 weeks                                                   | sPTB <24-29, 30-33, 34-36, and >37 weeks                  | case-control | Denmark        | <ul style="list-style-type: none"> <li>IL2</li> <li>IL6</li> <li>TNF<math>\alpha</math></li> <li>IFN<math>\gamma</math></li> <li>GM-CSF</li> </ul>                                                                                                                                               | <ul style="list-style-type: none"> <li>Y</li> <li>Y</li> <li>Y</li> <li>Y</li> <li>Y</li> </ul>                                                                                                               | TNF $\alpha$ & GM-CSF associated with late sPTB (34-36 wks)                                                                                 | underweight and obese                                                                                                                                                                                                                                                                                                                                   |
| 29 | Journal of Maternal-Fetal and Neonatal Medicine | Dhaifalah et al.  | 2014 | determine any association between azurocidin in 1st trimester with subsequent sPTB, PPRM and sPTB                                                                                                                                                                                               | mean age 30, primarily non smokers, spontaneous preterms were more likely than terms to be primiparous, but not significant                                                                                                                                                                                                                                                                                                                   | n=13 sPTB, n=17 PPRM, n=22 TB                                                            | cross sectional cohort study                                                                        | 2011                    | serum                         | ELISA                                                                        | 11-13 weeks                                               | sPTB <37 weeks                                            | case-control | Czech Republic | azurocidin                                                                                                                                                                                                                                                                                       | <ul style="list-style-type: none"> <li>Y</li> </ul>                                                                                                                                                           | low azurocidin associated with PPRM compared to all sPTB, sPTB and term delivery                                                            | PPROM                                                                                                                                                                                                                                                                                                                                                   |
| 30 | Fetal Diagnosis and Therapy                     | El-Achi et al.    | 2020 | identify risk factors for PPRM. Develop a 1st trimester prediction model                                                                                                                                                                                                                        | primarily caucasian and asian, no preexisting diabetes, non smokers, mean age 32.7, mean BMI 24.5-28 nulliparous, PPRM were more likely to have preexisting diabetes mellitus, be older and have higher BMI                                                                                                                                                                                                                                   | n=144 PPRM                                                                               | retrospective analysis of 1st trimester screening for aneuploidy and pre-eclampsia                  | April 2010-October 2016 | serum                         | ELISA?                                                                       | 11-13+6 weeks                                             | PPROM                                                     | cohort       | Australia      | <ul style="list-style-type: none"> <li>PAPP-A</li> <li>B-HCG</li> <li>PAPP-A (in model)</li> </ul>                                                                                                                                                                                               | <ul style="list-style-type: none"> <li>n</li> <li>n</li> <li>n</li> </ul>                                                                                                                                     | low PAPP-A lower risk of PPRM compared to high PAPP-A                                                                                       | nulliparity, preexisting DM, type 2DM, higher maternal age and BMI increased risk of PPRM                                                                                                                                                                                                                                                               |
| 31 | American Journal of Obstetrics and Gynecology   | Esplin et al.     | 2011 | to identify serum markers of sPTB in asymptomatic women before labor                                                                                                                                                                                                                            | mean age 24, approx. 30% nulliparous, approx 70% african american                                                                                                                                                                                                                                                                                                                                                                             | n=80 sPTB, n=40 TB collected at 24 wks, n=40 sPTB, n=40 TB collected at 28 wks           | nested case control, part of Preterm Prediction Study                                               | 1992 - 1994             | serum                         | mass spec                                                                    | n=80 sampled at 24 and additional n=80 at 28 weeks        | sPTB <35 wks                                              | case-control | USA            | <ul style="list-style-type: none"> <li>PGF</li> <li>TAT</li> <li>CRP</li> <li>defensin</li> <li>ferritin</li> <li>lactoferrin</li> <li>TNFI<math>\beta</math></li> <li>IFN<math>\gamma</math></li> </ul>                                                                                         | <ul style="list-style-type: none"> <li>Y</li> <li>Y</li> <li>Y</li> <li>Y</li> <li>Y</li> <li>Y</li> <li>Y</li> <li>Y</li> </ul>                                                                              | three proteomic peptides arising from IFN $\gamma$ were elevated in women at 24 and 28 weeks having subsequent sPTB compared to term        | na                                                                                                                                                                                                                                                                                                                                                      |
| 32 | American Journal of Perinatology                | Ezrin et al.      | 2015 | determine if a proteomic biosignature of circulating microparticles from 2nd trimester serum can identify sPTB                                                                                                                                                                                  | all primigravida or second pregnancy, no history of sPTB, mean age 28 for primigravida, 32 for second pregnancy, mostly non smokers, no diabetes                                                                                                                                                                                                                                                                                              | n=24 sPTB, n=24 TB                                                                       | required 1yr post screening?                                                                        | not stated              | serum                         | liquid chromatography mass spec                                              | 15-17 weeks                                               | sPTB<34 wks                                               | case-control | USA            | <ul style="list-style-type: none"> <li>A2M, C1B, C3, CH, SERPINA1, A3B, ALB, APOA1, CA, IGFBP2, APOD, AZGP1, HPA, IGHA1, IGHA1, IGGB, SERPINC1, TF</li> <li>18 'top' biomarkers of 99 proteins that were identified as differentially expressed in sPTB and term</li> </ul>                      | <ul style="list-style-type: none"> <li>Y</li> </ul>                                                                                                                                                           | 99 proteins were significantly different in terms compared to sPTB, 18 biomarkers were evaluated                                            | na                                                                                                                                                                                                                                                                                                                                                      |
| 33 | American Journal of Reproductive Immunology     | Ferguson et al.   | 2014 | compare cytokine profiles over 4 visits in pregnancy with normal and preterm pregnancies                                                                                                                                                                                                        | predominantly white (59%), education level (68% junior college, some college or college graduates) and non smokers (92%), majority publicly insured, mostly BMI <25                                                                                                                                                                                                                                                                           | n=350 TB PTB subgroups n=56 sPTB, n=35PET or IUGR                                        | nested case control,                                                                                | 2006-2008               | plasma                        | ELISA and bead based assay                                                   | 4.71-16.1 and 14.9-21.9 and 22.9-29.3 and 33.1-38.3 weeks | PTB<37 weeks                                              | case-control | USA            | <ul style="list-style-type: none"> <li>IL18</li> <li>IL6</li> <li>IL30</li> <li>TNFI<math>\beta</math></li> <li>CRP</li> </ul>                                                                                                                                                                   | <ul style="list-style-type: none"> <li>n</li> <li>Y</li> <li>Y</li> <li>Y</li> <li>n</li> </ul>                                                                                                               | IL6 was associated with increased odds of sPTB, associations strongest later in pregnancy                                                   | Association of CRP higher in African American compared to caucasian, high school education compared to college degree, public compared to private health insurance, and BMI>25 kg/m <sup>2</sup> . Increased levels of IL6, IL18 and TNF $\alpha$ associated with overall PTB. IL6 stronger predictor of sPTB, IL18 stronger predictor in placental PTB |
| 34 | American Journal of Obstetrics and Gynecology   | Goldenberg et al. | 2000 | determine if G-CSF measured in asymptomatic women at 24 and 28 weeks is associated with sPTB at <32 weeks                                                                                                                                                                                       | predominantly 16-35 years old, 72.7% african american, 33.5% nulliparous, preterms were more likely to have BMI <18.8 and to have had preeclampsia disease, a previous spontaneous preterm birth, vaginal bleeding, or a urinary tract infection                                                                                                                                                                                              | n=194 sPTB, n=194 TB collected at 24 wks. Of these 132 had additional sample at 28 weeks | nested case control as part of Preterm Prediction Study                                             | 1992 - 1994             | plasma                        | ELISA                                                                        | 24 and 28 week collection                                 | sPTB<32 weeks                                             | case-control | USA            | G-CSF                                                                                                                                                                                                                                                                                            | <ul style="list-style-type: none"> <li>Y</li> </ul>                                                                                                                                                           | elevated G-CSF is associated with early sPTB                                                                                                | elevated G-CSF at 24 and 28 weeks associated with sPTB at <32 weeks but not later sPTB                                                                                                                                                                                                                                                                  |
| 35 | American Journal of Obstetrics and Gynecology   | Goldenberg et al. | 2001 | in asymptomatic women identify biomarkers associated with sPTB                                                                                                                                                                                                                                  | the cohort that cases and controls were selected from was 68% black, 58% multigravida, and mean age was 23.7, with cases and controls preterms were more likely to have had a previous spontaneous sPTB                                                                                                                                                                                                                                       | n=50 sPTB <32 weeks, n=127 sPTB <35 weeks matched term controls                          | nested case control as part of Preterm Prediction Study                                             | 1992 - 1994             | serum                         | unreported                                                                   | 24 and 28 weeks                                           | sPTB<32 and sPTB<35 weeks                                 | case-control | USA            | <ul style="list-style-type: none"> <li>CRP</li> <li>AFP</li> <li>alkaline phosphatase</li> <li>B2M</li> <li>ferritin</li> <li>ICAM-1</li> <li>IL6</li> <li>CRP</li> <li>control</li> <li>lactoferrin</li> <li>defensin</li> <li>relaxin</li> <li>IL10</li> <li>G-CSF</li> <li>actvian</li> </ul> | <ul style="list-style-type: none"> <li>n</li> <li>Y</li> <li>Y</li> <li>n</li> <li>Y</li> <li>Y</li> <li>Y</li> <li>n</li> <li>n</li> <li>n</li> <li>n</li> <li>n</li> <li>n</li> <li>n</li> <li>Y</li> </ul> | combining 5 markers (control IFN $\gamma$ , cervical length, AFP, alkaline phosphatase, ICAM-1, and defensin), G-CSF was predictive of sPTB | With sPTB<32wks, significant association with AFP, alkaline phosphatase, ICAM-1, and defensin, but with sPTB<35 weeks only AFP and alkaline phosphatase.                                                                                                                                                                                                |
| 36 | Journal of Obstetrics and Gynaecology Research  | Gupta et al.      | 2015 | determine if low PAPP-A associated with adverse pregnancy outcomes                                                                                                                                                                                                                              | mean age 25, mean weight 53 kg, approx half nulliparous, all non smokers,                                                                                                                                                                                                                                                                                                                                                                     | n=130 with low PAPP A, n=200 with normal range PAPP-A as controls                        | North Indian cohort                                                                                 | Aug 2010 to Dec 2011    | serum                         | fluorometry                                                                  | 9-13 weeks                                                | PTB <37 weeks, FGR, PET, oligohydramnios, low birthweight | case-control | India          | PAPP-A                                                                                                                                                                                                                                                                                           | <ul style="list-style-type: none"> <li>Y</li> </ul>                                                                                                                                                           | incidence of PTB was higher in women with low PAPP-A                                                                                        | low PAPP-A associated with FGR, oligohydramnios and low birthweight. This was less significant for preterm delivery                                                                                                                                                                                                                                     |
| 37 | American Journal of Obstetrics and Gynecology   | Hackney et al.    | 2010 | determine association of thrombin-antithrombin (TAT) in asymptomatic women at 24 and 28 weeks and sPTB                                                                                                                                                                                          | mean age 23, 72.1% black, preterms were more likely to have lower BMI, prior vaginal bleeding and a prior sPTB                                                                                                                                                                                                                                                                                                                                | n=169 matched sPTB/TB pairs at 24 weeks, n=138 at 28 weeks                               | nested case control as part of Preterm Prediction Study                                             | 1992 - 1994             | serum                         | immunoassay                                                                  | 23-24 and 27-28 weeks                                     | sPTB <37 weeks                                            | case-control | USA            | TAT                                                                                                                                                                                                                                                                                              | <ul style="list-style-type: none"> <li>Y</li> </ul>                                                                                                                                                           | TAT was lower in sPTB compared to term at 24 weeks, but not at 28 weeks                                                                     | TAT levels measured at 28wk but not at 24 weeks was associated with sPTB at <37 weeks,                                                                                                                                                                                                                                                                  |
| 38 | PLoS ONE                                        | Heng et al.       | 2016 | examine the expression profile in asymptomatic women, collected at 17-23 weeks and 28-33 weeks and determine if predictive of sPTB                                                                                                                                                              | mean age 31, primarily caucasian and non smokers, preterms were more likely than terms to have a history of previous sPTB, history of abortion, UTI during pregnancy, anaemia during pregnancy and have group B streptococcus in vaginal tract <36 weeks/gp                                                                                                                                                                                   | n=51 sPTB, n=114 TB                                                                      | longitudinal cohort                                                                                 | May 2008 - Dec 2010     | RNA isolated from whole blood | affymetrix multiplex microarray of RNA                                       | 17-33 weeks                                               | sPTB <37 weeks                                            | case-control | Canada         | <ul style="list-style-type: none"> <li>top of three models contained the following gene features: LOC100128908, MIR3899, LOC101927441, CST13P, ACA2P, ZNF324, SH3PXD2B, TBK2I</li> </ul>                                                                                                         | <ul style="list-style-type: none"> <li>Y</li> </ul>                                                                                                                                                           | model using the difference in gene expression at two timepoints can predict sPTB with 65% sensitivity and 88% specificity                   | antepartum haemorrhage, urinary tract infection during pregnancy, anaemia                                                                                                                                                                                                                                                                               |



|    |                                                    |                    |      |                                                                                                                                              |                                                                                                                                                                                                                                                                                                                                                                                                    |                            |                                                                                                                                               |            |             |                                                                                  |                       |                                               |              |                           |                                                                                                                                                                                                                                                                                                                                                                                                                                                                                                                                                                                                                                                                                                                                                                                                       |                                                                                                                                                                                                                          |                                                                                                                                                                                 |    |
|----|----------------------------------------------------|--------------------|------|----------------------------------------------------------------------------------------------------------------------------------------------|----------------------------------------------------------------------------------------------------------------------------------------------------------------------------------------------------------------------------------------------------------------------------------------------------------------------------------------------------------------------------------------------------|----------------------------|-----------------------------------------------------------------------------------------------------------------------------------------------|------------|-------------|----------------------------------------------------------------------------------|-----------------------|-----------------------------------------------|--------------|---------------------------|-------------------------------------------------------------------------------------------------------------------------------------------------------------------------------------------------------------------------------------------------------------------------------------------------------------------------------------------------------------------------------------------------------------------------------------------------------------------------------------------------------------------------------------------------------------------------------------------------------------------------------------------------------------------------------------------------------------------------------------------------------------------------------------------------------|--------------------------------------------------------------------------------------------------------------------------------------------------------------------------------------------------------------------------|---------------------------------------------------------------------------------------------------------------------------------------------------------------------------------|----|
| 53 | American Journal of Obstetrics and Gynecology      | Lynch et al.       | 2016 | to perform a large scale biomarker discovery and to determine which protein pathways are most strongly associated with PTB                   | mean age 34, primarily non hispanic white, 46% nulliparous, preterm were more likely than terms to be a race other than non hispanic white                                                                                                                                                                                                                                                         | n=22 sPTB, n=88 TB         | Denver Complement Study                                                                                                                       | not stated | plasma      | SOMAscan proteomic assay                                                         | 10-15 weeks           | sPTB 20-37 weeks with or without PPRM         | case-control | USA                       | coagulation factor IX, coagulation factor IX ab, factor B, FCAM1, Factor H, SAP, VEGF, IL2, CAT2, growth hormone receptor, ficolin-3, AT515, Fc-gammaR, MPO2, cathepsin A, leptin, C5a, PIGR, calcitonin receptor, GCMF, complement PIG, TLR2, ang-1, RET, JAG1, MMP-2, Neoh-3, angiotensin-2, MAPKAP3, PAPP-A, FN1-3, IGFBP-2, fibronectin, M22A, hemopexin                                                                                                                                                                                                                                                                                                                                                                                                                                          | complement factor B and H and coagulation factor IX were the highest ranking proteins distinguishing PTB from term                                                                                                       | na                                                                                                                                                                              |    |
| 54 | Journal of Clinical Laboratory Analysis            | Ma et al.          | 2020 | study whether complete blood count (CBC) parameters at 20-30 weeks of pregnancy can predict asymptomatic PTB                                 | mean age 30, mean pregnancy BMI 20, mean gravidity 1.7, mean parity 0.3                                                                                                                                                                                                                                                                                                                            | n=105 sPTB, n=210 TB       | Fujian Provincial Maternity and Children's Hospital                                                                                           | 2017       | whole blood | Sysmex-SN3000 blood cell counter                                                 | 20-30 weeks           | sPTB 28-36 weeks                              | case-control | China                     | whole blood count<br>neutrophil count<br>lymphocyte count<br>hemoglobin<br>hematocrit<br>red cell distribution width<br>platelet count<br>mean platelet volume<br>plateletcrit<br>platelet distribution width<br>neutrophil to lymphocyte ratio<br>lymphocyte to monocyte ratio<br>platelet to lymphocyte ratio                                                                                                                                                                                                                                                                                                                                                                                                                                                                                       | neutrophil to lymphocyte ratio, hemoglobin, platelet distribution width in combination predicts PTB with sensitivity and specificity of 88% and 41%                                                                      | na                                                                                                                                                                              |    |
| 55 | Epigenomics                                        | Manuck et al.      | 2021 | measure whether changes in RNA in mother's blood in early pregnancy are predictive of early delivery                                         | women at high risk of spontaneous preterm delivery, 34.6% non hispanic black race, mean age 31.6, 64.0% married, 34.3 low socioeconomic status, 11.2% smoking in pregnancy, median pregnancy BMI 29.3, 32.4% nulliparous, 91.3% prior PTB, preterm births <34 weeks were more likely to be nulliparous than term births, preterms were 155 likely to have had a prior PTB than terms               | n=68 sPTB, n=68 TB         | UNC FPI Biobank cohort study                                                                                                                  | 2015-2017  | whole blood | 212 gene custom nanostring mRNA panel and custom 108 gene Nanostring miRNA panel | <24 weeks             | sPTB <37 and <34 weeks                        | case-control | USA                       | 212 mRNAs and 108 miRNAs in the NO pathway were evaluated<br>TLR2, CDSR5, RUC2C, PPP3CA, B3M, FLR4, ILORA, PRKCI, CYCL1, CH1L, CXCL3, IL13RA, DGM2, M7P, HOPRMB1, NCF1, M58A, S0M4, G4A, NCOA2                                                                                                                                                                                                                                                                                                                                                                                                                                                                                                                                                                                                        | fourteen genes were differentially expressed in women delivering <37 weeks, 12/14 were also differentially expressed in those delivering <34 weeks compared to term. Gene expression improved clinical prediction models | CYCL1 was associated with PTB <37 weeks but not PTB <34 weeks; more perturbations were seen in mRNA expression for PTB <34 weeks than in PTB <37 weeks                          |    |
| 56 | PLoS ONE                                           | McDonald et al.    | 2015 | examine whether levels of inflammatory and angiogenic mediators, measured early in pregnancy, were predictive of PTB                         | primigravids singletons taking daily doses of iron and folic acid, and presumptive anti-reflux therapy with sucralfate/gymnastherm tablets at 20 and 30 weeks gestation, all HIV negative, mean age 22, majority had <5 years of education, preterms were more likely to be younger, be unmarried, have fewer years of education, lower BMI and skullrod thickness, and lower socioeconomic status | n=432 training, n=646 test | multivitamin supplementation cohort for HIV negative women                                                                                    | 2012-2013  | plasma      | ELISA                                                                            | 12-27 weeks           | sPTB <37 and <34 weeks                        | cohort       | Canada (Tanzanian Cohort) | Ang-1<br>Ang-2<br>Angptl3<br>VEGF<br>sFlt-1<br>sTnfr2<br>PGF<br>MMP-10<br>MCP-1<br>leptin<br>IL18<br>IL18BP<br>sICAM-1<br>Factor D<br>sEndoglin<br>CSP<br>CHSL1<br>C5a                                                                                                                                                                                                                                                                                                                                                                                                                                                                                                                                                                                                                                | IL-18, sICAM-1, sEndoglin and CHSL1 were elevated and leptin was lower in those that experience PTB. High leptin and Ang2 had reduced risk of PTB                                                                        | risk of early to moderate PTB increased with increasing CHSL1, sICAM-1, and IL-18BP whereas risk of late PTB increased with increasing sTnfr2, CHSL1, C5a, sICAM-1, and IL-18BP |    |
| 57 | American Journal of Obstetrics and Gynecology      | McElrath et al.    | 2019 | validate the circulating microparticle protein multiplex concept using a larger sample set to predict sPTB                                   | mean age 31, 22% african american, mean BMI 28, majority privately insured, 10% smoking during pregnancy, mean parity 1, 49% male fetal sex                                                                                                                                                                                                                                                        | n=87sPTB, n=174 TB         | Brighton and Women's Hospital and the Magee Women's Research Institute, and the Global Alliance to Prevent Prematurity and Still Birth        | not stated | plasma      | liquid chromatography mass spec                                                  | 10-12 weeks           | sPTB <35 weeks                                | case-control | USA                       | F13A, GRN1, K1, ITIH2, LGAT1, LGAT, TRF1, ITIH4                                                                                                                                                                                                                                                                                                                                                                                                                                                                                                                                                                                                                                                                                                                                                       | panel of proteins revealed AUC 0.74, 0.77 in nulliparous women using a different panel                                                                                                                                   | different multiplex panels were identified as being the highest performing for primipara vs multipara                                                                           |    |
| 58 | American Journal of Obstetrics and Gynecology      | Mclean et al.      | 1999 | evaluate the ability of high plasma placental peptide CRH and AFP to prospectively discriminate pregnancies at high risk of preterm delivery | primarily anglo-saxon white, middle-class australians, median ga at preterm delivery 34 weeks                                                                                                                                                                                                                                                                                                      | n=37 sPTB, n=860 TB        | John Hunter Hospital                                                                                                                          | not stated | plasma      | radioimmunoassay                                                                 | 17-30 weeks           | sPTB <37 weeks                                | cohort       | Australia                 | CRH<br>AFP                                                                                                                                                                                                                                                                                                                                                                                                                                                                                                                                                                                                                                                                                                                                                                                            | those with sPTB had higher concentration of CRH and AFP than term. 3 marker combination predicted better than either alone                                                                                               | no significant difference between nulliparous and multiparous women or between pregnancies carrying a male fetus vs female fetus                                                |    |
| 59 | Science                                            | Ngo et al.         | 2018 | develop a classifier to identify women who are at risk of preterm delivery                                                                   | predominantly african american, all had a prior spontaneous PTB and received progesterone injections, mean age 25, mean BMI 30                                                                                                                                                                                                                                                                     | n=8 sPTB, n=7 TB           | Denmark, University of Pennsylvania and University of Alabama cohorts                                                                         | not stated | blood       | RNaseq then RT-PCR                                                               | 12-37 weeks           | sPTB <37 weeks                                | cohort       | USA and Denmark           | panel of 7 crnAs predicted sPTB: C10M, DAPP1, PBP1, MA3PKC1, MOR1B, R487R, RGS18                                                                                                                                                                                                                                                                                                                                                                                                                                                                                                                                                                                                                                                                                                                      | 38 crnAs were differentially expressed in sPTB compared to term - unclear what these are                                                                                                                                 | top seven crnAs from the panel accurately classified 6 of 7 preterm and misclassified 1/26 terms                                                                                | na |
| 60 | EBioMedicine                                       | Olsen SF et al.    | 2018 | examine the association between plasma fatty acids quantified in pregnancy and subsequent risk of early PTB                                  | primarily 21-45 years old, in a couple, non smokers, pregnancy BMI 18.5-24.9, and own their own residence, 57% nulliparous                                                                                                                                                                                                                                                                         | n=376 sPTB, n=348 TB       | Danish National Birth Cohort                                                                                                                  | 1996-2002  | plasma      | liquid chromatography mass spec                                                  | 9 and 25 weeks        | sPTB <34 weeks                                | case-control | Denmark                   | ecosaturated fatty acid + docosahexaenoic acid                                                                                                                                                                                                                                                                                                                                                                                                                                                                                                                                                                                                                                                                                                                                                        | risk of PTB increases with lower EPA and DHA levels                                                                                                                                                                      | na                                                                                                                                                                              |    |
| 61 | Journal of Maternal-Fetal and Neonatal Medicine    | Olsen RN et al.    | 2014 | evaluate whether maternal estradiol concentrations from second trimester serum correlated with PTB                                           | mean age 29, 20% of American Indians in the cohort had a preterm delivery, preterms were more likely to have higher gravidity than terms                                                                                                                                                                                                                                                           | n=7767                     | women who had second trimester maternal serum aneuploidy screening                                                                            | 1995-2010  | serum       | immunoassay                                                                      | 15-22 weeks           | sPTB <37, 24-28, 28-32, 32-35 and 35-37 weeks | cohort       | USA                       | uE3                                                                                                                                                                                                                                                                                                                                                                                                                                                                                                                                                                                                                                                                                                                                                                                                   | elevated estradiol was significantly associated with PTB and estradiol level correlated with gestational age at delivery                                                                                                 | estradiol was more predictive of PTB at 22-34.8 weeks than at 24, 27.9, 28.31.9 and 31-37 weeks                                                                                 |    |
| 62 | American Journal of Obstetrics and Gynecology      | Parry et al.       | 2014 | identify serum biomarkers of early sPTB using semi-quantitative proteomic analysis                                                           | women with previous sPTB, mean age 26, primarily caucasian or black or african american, mean BMI 26, approx 30% college educated, 31% gravidity=1                                                                                                                                                                                                                                                 | n=35 sPTB, n=35 TB         | University of Alabama at Birmingham, University of Texas Medical Branch at Galveston and University of Utah with history of at least one sPTB | not stated | serum       | liquid chromatography mass spec and western blot                                 | 19-24 and 28-32 weeks | sPTB <34 and 34/27 weeks                      | case-control | USA                       | differentially expressed in term and preterms: cathepin-1, calcitriol precursor, serpinB7, proteasome subunit B type-8 isoform B, gila-derived exon isoform c precursor, galectin-3 binding protein, peptidylglyoxyl isomerase 3, heat shock protein B1, thrombospondin-1 precursor, fibronectin-1, isoform 1 precursor, an-2-glycoprotein, histidine-rich glycoprotein, paraplayin-1, carbonylpeptidase B, serum amyloid P-component, apolipoprotein A-IV, apolipoprotein E-2, angipainin isoform b, ficolin-3 isoform 1, corticosteroid binding globulin, vitagenin-1 isoform 1, thyroxine-binding protein-2 isoform 1, plasminogen isoform 1, N-acetylmuramidase-4-diamine amidase, IGFBP-8, pregnancy zone protein, prothrombin, retinol binding protein-4, S100 isoform 3, vitronectin, SERPINE1 | serpin B7 was 1.5 fold higher in PTB compared to controls and associated with shorter interval to delivery and lower gestational age at delivery                                                                         | na                                                                                                                                                                              |    |
| 63 | International Journal of Gynecology and Obstetrics | Paternoster et al. | 2002 | to identify predictive biochemical markers for sPTB                                                                                          | all caucasian, no risk factors for PTB, 68% nulliparous, mean age 33                                                                                                                                                                                                                                                                                                                               | n=2254                     | women receiving routine prenatal care in the Gynecology and Obstetrics Institute of Padova University                                         | not stated | serum       | chemiluminescent immunometric assay                                              | 24 weeks              | sPTB <37 weeks                                | cohort       | Italy                     | IL6<br>IL8<br>TNFa<br>ferritin<br>ferritin, cervical IEL, vaginal pH and cervical FN                                                                                                                                                                                                                                                                                                                                                                                                                                                                                                                                                                                                                                                                                                                  | serum ferritin was higher in sPTB compared to term. Cervical markers were best marks for prediction                                                                                                                      | serum ferritin was predictive of PTB <35 weeks but not overall PTB or PTB <32 weeks                                                                                             |    |
| 64 | Journal of Obstetrics and Gynecology of India      | Patil et al.       | 2014 | to study the pregnancy outcome in relation to the variations of PAPP-A level in the first trimester                                          | patients registered to deliver at Bharati Hospital and Research Centre, Pune. No participant demographic information                                                                                                                                                                                                                                                                               | n=524                      | patients receiving first trimester screening                                                                                                  | not stated | serum       | PerkinElmer lab (not described)                                                  | 11-13 weeks           | sPTB 32-36 and 28-32 weeks                    | cohort       | India                     | PAPP-A                                                                                                                                                                                                                                                                                                                                                                                                                                                                                                                                                                                                                                                                                                                                                                                                | low PAPP-A is associated with high risk for preterm delivery, with low positive predictive value                                                                                                                         | na                                                                                                                                                                              |    |

|    |                                                 |                 |      |                                                                                                                                                                                                                                                                                                      |                                                                                                                                                                                                                                                                                                                             |                                            |                                                                                                                                                                |            |        |                                                    |                |                            |              |          |                                                                                                                                                                                          |                                                                                                  |                                                                                                                               |                                                                                                                                                                                    |
|----|-------------------------------------------------|-----------------|------|------------------------------------------------------------------------------------------------------------------------------------------------------------------------------------------------------------------------------------------------------------------------------------------------------|-----------------------------------------------------------------------------------------------------------------------------------------------------------------------------------------------------------------------------------------------------------------------------------------------------------------------------|--------------------------------------------|----------------------------------------------------------------------------------------------------------------------------------------------------------------|------------|--------|----------------------------------------------------|----------------|----------------------------|--------------|----------|------------------------------------------------------------------------------------------------------------------------------------------------------------------------------------------|--------------------------------------------------------------------------------------------------|-------------------------------------------------------------------------------------------------------------------------------|------------------------------------------------------------------------------------------------------------------------------------------------------------------------------------|
| 65 | British Journal of Obstetrics and Gynaecology   | Petersen et al. | 1992 | determine whether high serum retinol concentrations in the 30th week of pregnancy were associated with preterm labour                                                                                                                                                                                | living in Aarhus town or certain designated areas around the town, mean age 29, rate of sPTB was 2.4%, majority primigravidae.                                                                                                                                                                                              | n=32 sPTB, n=46 TB                         | Two antenatal clinics of the department of Obstetrics and Gynecology University Hospital Aarhus                                                                | 1988-1989  | serum  | ELISA                                              | 30 weeks       | sPTB <37 weeks             | case-control | Denmark  | retinol                                                                                                                                                                                  | Y                                                                                                | high serum retinol concentrations may be associated with preterm delivery                                                     | difference in retinol levels between preterm and term was more pronounced in primigravidae women; retinol levels were higher in PPROM than in sPTD without PPROM (not significant) |
| 66 | Prenatal Diagnosis                              | Pihl et al.     | 2009 | establish the first trimester serum levels of the proform of eosinophil major basic protein (proMBP) in pregnancies with adverse outcome, and to determine the screening performance using proMBP alone and in combination with other first trimester markers                                        | all caucasian, median age 29, preterm were more likely than term to be younger, smoke and to be nulliparous                                                                                                                                                                                                                 | n=88 sPTB, n=500 TB                        | enrolled in first trimester combine screening program for Down's syndrome                                                                                      | 2005-2007  | serum  | immunofluorescence assay                           | TM1            | sPTB <37                   | case-control | Denmark  | proform of eosinophil major basic protein                                                                                                                                                | Y                                                                                                | proMBP was reduced in pregnancies with sPTB                                                                                   | proMBP was reduced in sPTB (<37 weeks) but not in earlier PTB                                                                                                                      |
| 67 | Prenatal Diagnosis                              | Pihl et al.     | 2009 | establish the first trimester levels of pregnancy specific beta 1 glycoprotein (SP1) in pregnancies with adverse outcome and to determine the screening performance for adverse outcome using SP1 alone and in combination with other first trimester markers including proMBP and PAPP-A            | all caucasian, median age 29, preterm were more likely than term to be younger, smoke and to be nulliparous                                                                                                                                                                                                                 | n=88 sPTB, n=500 TB                        | enrolled in first trimester combine screening program for Down's syndrome                                                                                      | 2005-2007  | serum  | immunofluorescence assay                           | TM1            | sPTB <37                   | case-control | Denmark  | pregnancy specific beta 1 glycoprotein                                                                                                                                                   | Y                                                                                                | SPA was significantly reduced in pregnancies with sPTB, only slightly improved prediction when combined with PAPP-A or proMBP | SP1 was lower in late sPTD (>37 weeks) but not in earlier PTD                                                                                                                      |
| 68 | American Journal of Epidemiology                | Pitiphat et al. | 2005 | examine the association of CRP with preterm delivery                                                                                                                                                                                                                                                 | primarily white or black, 16.7% had smoked in the 3 months before they knew they were pregnant, preterm were more likely to be heavier before conception and to have had a previous PTB and a genital/urinary infection during the current pregnancy                                                                        | n=117 sPTB, n=117 TB                       | Project Viva                                                                                                                                                   | 1999-2002  | serum  | immunoturbidimetric assay                          | 5.3-19.3 weeks | sPTB <37 weeks             | case-control | USA      | CRP                                                                                                                                                                                      | Y                                                                                                | no association between CRP (third and fourth) and PTB, but very high levels of CRP were associated with increased risk of PTB | CRP levels were higher in women who had a previous PTB than those who had not and higher in PTB <34 weeks than PTB between 34 and 37 weeks                                         |
| 69 | Prenatal Diagnosis                              | Poon et al.     | 2009 | investigate the potential value of maternal serum MMP-9 in first trimester screening for preeclampsia and sPTB                                                                                                                                                                                       | primarily white, spontaneous conception, median age 32, approx half nulliparous, preterm were more likely to smoke, to have diabetes mellitus and to have had a previous sPTB                                                                                                                                               | n=57 sPTB, n=569 TB                        | routine assessment of risk for chromosomal abnormalities by fetal nuchal translucency thickness and serum screens                                              | not stated | serum  | ELISA                                              | 11-13 weeks    | sPTB <34 weeks             | case-control | UK       | MMP-9<br>TIMP1<br>PAPP-A                                                                                                                                                                 | Y<br>n<br>n                                                                                      | MMP-9 was higher at term than sPTB. Prediction was not improved with MMP-9 over history alone                                 | na                                                                                                                                                                                 |
| 70 | Fetal Diagnosis and Therapy                     | Poon et al.     | 2013 | examine the possible relationship between maternal and fetal characteristics and pregnancy outcomes on fetal and maternal cell free DNA in maternal plasma at 11-13 weeks gestation                                                                                                                  | median age 31.8, median weight 65 kg, median height 164 cm, 70% caucasian, 20% afro-caribbean, 6.2% smokers, 98% spontaneous conception                                                                                                                                                                                     | n=1949                                     | prospective first trimester combine screening for aneuploidies and adverse outcomes                                                                            | not stated | plasma | chromosome selective sequencing                    | 11-13 weeks    | sPTB <34 weeks             | cohort       | UK       | [maternal cDNA]<br>[fetal cDNA]                                                                                                                                                          | n                                                                                                | cDNA was not significantly altered in pregnancies complicated by sPTB                                                         | na                                                                                                                                                                                 |
| 71 | Biological Research for Nursing                 | Ruiz et al.     | 2002 | investigate the relationship and predictability of CRH on gestational age at birth, develop a predictive model, examine differences in CRH by groups and examine proportion of cigarette smoking in groups that had high or low stress scores                                                        | predominantly medical clients, age range 18-40 years (69% 23-29 years), 20% less than high school education, 75% anglo-american, 20% hispanic, 60% married, mean age at delivery was 40 weeks, higher gravidity = higher % of sPTB                                                                                          | n=78                                       | private practice of 2 obstetrician/gynecologists in central Texas                                                                                              | not stated | plasma | radioimmunoassay                                   | 24 or 32 weeks | sPTB <37 weeks             | cohort       | USA      | CRH                                                                                                                                                                                      | Y                                                                                                | stress and CRH was weakly associated, ethnicity did not improve prediction                                                    | na?                                                                                                                                                                                |
| 72 | American Journal of Obstetrics and Gynecology   | Saade et al.    | 2016 | develop and validate a machine learning based serum test to predict sPTB in asymptomatic pregnancy women                                                                                                                                                                                             | mean age 28, median BMI 27, 70% white, 23% black or african american, approx 70% nulligravidae, 17% smoking, preterm were more likely to have had 1 or more previous PTBs and to have experienced bleeding after 12 weeks in the study pregnancy, controls in the overall validation cohort were more likely to be hispanic | n=5501                                     | prospective Proteomic Assessment of Preterm Risk at 11 sites in USA                                                                                            | 2011-2013  | serum  | multiple monitoring mass spec                      | 17-28 weeks    | sPTB <37 weeks             | case-control | USA      | BP4/SHBG                                                                                                                                                                                 | Y                                                                                                | BP4/SHBG predictor AUC 0.75 sensitivity and specificity of 0.76 and 0.74, accuracy increased for early sPTB (<35 weeks)       | predictive performance was improved by BMI stratification of >22 and <+37                                                                                                          |
| 73 | Taiwanese Journal of Obstetrics and Gynaecology | Shin et al.     | 2016 | investigate which ultrasound findings or serum biomarkers, including insulin like growth factor (IGF-1) and insulin like growth factor binding protein 1 and 3 (IGFBP1, IGFBP3) in the first and early second trimesters are the best predictors for preterm delivery                                | median age 33, median height 161, median weight 55 kg, median BMI 22, approx half nulliparous                                                                                                                                                                                                                               | n=25 sPTB, n=48 TB                         | women receiving routine antenatal care at 11-18 weeks                                                                                                          | 2011-2013  | serum  | ELISA, immunoturbidimetric assay, bead based assay | 11-18 weeks    | sPTB 24-36 weeks           | case-control | Korea    | HDL<br>estradiol<br>APP<br>inhibin A<br>HCG<br>IGF-1<br>IGFBP-1<br>IGFBP-3<br>CRP<br>procalcitonin<br>NGAL<br>PFGF<br>IL2<br>IL6<br>IL10<br>IL12<br>IL17<br>IFN $\gamma$<br>TNF $\alpha$ | n<br>n<br>Y<br>n<br>n<br>Y<br>n<br>n<br>n<br>n<br>n<br>n<br>n<br>n<br>n<br>n<br>n<br>n<br>n<br>n | IGFBP-3 and cervical length were significantly higher sPTB                                                                    | na                                                                                                                                                                                 |
| 74 | American Journal of Obstetrics and Gynaecology  | Sibai et al.    | 2005 | examine the utility of a single second trimester plasma corticotropin releasing hormone measurement as a marker for preterm delivery in women at high risk for preterm delivery                                                                                                                      | women with at least 1 previous spontaneous PTB, 77.3% african american, mean age 25, preterm were more likely to have a higher number of previous sPTBs                                                                                                                                                                     | n=173                                      | NICHD multicenter placebo controlled trial designed to evaluate the role of 17 alpha hydroxyprogesterone caproate in the prevention of recurrent preterm birth | not stated | plasma | ELISA                                              | 16-20 weeks    | sPTB <37 weeks             | cohort       | USA      | CRH                                                                                                                                                                                      | n                                                                                                | no differences in CRH in those that delivered <37 weeks or <35 weeks compared to term                                         | na                                                                                                                                                                                 |
| 75 | Obstetrics and Gynecology                       | Smith et al.    | 2007 | estimate the relationship between maternal serum levels of placental growth factor (PGF) and soluble fms like tyrosine kinase 1 (sFlt-1) in early pregnancy with the risk of subsequent adverse outcome                                                                                              | primarily white, non smokers, median age 29.5, approx half nulliparous, approx half married, median height 1.62 m, median BMI 23.7                                                                                                                                                                                          | n=65 early sPTB, n=227 late sPTB, n=937 TB | prospective cohort study of Down syndrome screening                                                                                                            | 1997-1999  | serum  | ELISA                                              | 10-14 weeks    | sPTB 24-32 and 33-36 weeks | case-control | UK       | sFlt-1<br>PGF                                                                                                                                                                            | Y<br>n                                                                                           | higher levels of sFlt-1 were associated with reduced risk of extreme and moderate sPTB                                        | na                                                                                                                                                                                 |
| 76 | International Journal of Epidemiology           | Smith et al.    | 2006 | determine which maternal and biochemical factors are associated with the relative risk of sPTB and whether the relative risks associated with these factors significantly varied over the period of 24-36 weeks gestation and whether these factors could yield clinically useful prediction of risk | all nulliparous, median age 26, median height 163, median BMI 23.3, 30% smokers, approx half married, preterm were more likely to be shorter, to smoke, and to have had a previous miscarriage or previous therapeutic abortion                                                                                             | n=84391                                    | Scottish Morbidity Record from Scottish maternity hospitals                                                                                                    | not stated | serum  | maternal serum screen (secondary data)             | TM2            | sPTB 24-36 weeks           | cohort       | Scotland | AFP<br>hCG                                                                                                                                                                               | Y<br>Y                                                                                           | risk of sPTB was positively associated with AFP. Risk of sPTB at 24-28 weeks was associated with hCG                          | high levels of hCG and age <20 were associated with extreme PTB but not mild or moderate PTB                                                                                       |

|    |                                                 |                 |      |                                                                                                                                                                                                                          |                                                                                                                                                                                                                                                                                                                                                                                                                                                         |                                                                   |                                                                                                                                                                                                                |            |             |                                                                  |                             |                                               |              |            |                                                                                                                                                                                                                                                                                                                                                                                                                                                                                                                                                                                                                                                                                                                                                                                       |   |                                                                                                                                                          |                                                                                                                                                                           |
|----|-------------------------------------------------|-----------------|------|--------------------------------------------------------------------------------------------------------------------------------------------------------------------------------------------------------------------------|---------------------------------------------------------------------------------------------------------------------------------------------------------------------------------------------------------------------------------------------------------------------------------------------------------------------------------------------------------------------------------------------------------------------------------------------------------|-------------------------------------------------------------------|----------------------------------------------------------------------------------------------------------------------------------------------------------------------------------------------------------------|------------|-------------|------------------------------------------------------------------|-----------------------------|-----------------------------------------------|--------------|------------|---------------------------------------------------------------------------------------------------------------------------------------------------------------------------------------------------------------------------------------------------------------------------------------------------------------------------------------------------------------------------------------------------------------------------------------------------------------------------------------------------------------------------------------------------------------------------------------------------------------------------------------------------------------------------------------------------------------------------------------------------------------------------------------|---|----------------------------------------------------------------------------------------------------------------------------------------------------------|---------------------------------------------------------------------------------------------------------------------------------------------------------------------------|
| 77 | Journal of Maternal-Fetal and Neonatal Medicine | Soni et al.     | 2018 | evaluate relationship between first and second trimester maternal serum free B-HCG and the risk of sPTB                                                                                                                  | mean age 32, mean BMI 31, 83% caucasian, 10% african american, preterms were more likely to be older and african american and to have had a prior PTB                                                                                                                                                                                                                                                                                                   | n=173 sPTB, n=704 TB                                              | women enrolled at antepartum units and delivered at hospitals in the Northwest Health System                                                                                                                   | 2011-2015  | serum       | PerkinElmer labs (not described)                                 | 11-13 weeks                 | sPTB <37 weeks with or without PPRM           | case-control | USA        | B-HCG                                                                                                                                                                                                                                                                                                                                                                                                                                                                                                                                                                                                                                                                                                                                                                                 | Y | high maternal first and second trimester B-HCG was associated with low rates of PTB, but not associated with different likelihood of PTB                 | high B-HCG was more strongly associated with decreased odds of PTB in those without prior PTB than in those with prior PTB                                                |
| 78 | Ultrasound in Obstetrics and Gynecology         | Spencer et al.  | 2008 | examine the clinical utility of the first trimester markers of aneuploidy in their ability to predict preterm delivery                                                                                                   | primarily caucasian, mean age 31, mean weight 64 kg, approx 11% smokers, approx half nulliparous,                                                                                                                                                                                                                                                                                                                                                       | n=57422                                                           | patients that had undergone screening for trisomy 21 by fetal nuchal translucency thickness and maternal serum free B-HCG and PAPP-A                                                                           | 1998-2003  | serum       | kryptor analyzer                                                 | 11-13 weeks                 | sPTB <37 weeks                                | cohort       | UK         | B-HCG<br>PAPP-A                                                                                                                                                                                                                                                                                                                                                                                                                                                                                                                                                                                                                                                                                                                                                                       | Y | low levels of PAPP-A are associated with increased risk of PTB                                                                                           | none                                                                                                                                                                      |
| 79 | Fertility and Sterility                         | Stegmann et al. | 2015 | determine the association of PTB with androgenic hormone levels both in isolation and in combination with other markers of the fetoprenatal health commonly measured during integrated prenatal screening for aneuploidy | all white, mean age 28.8, mostly non smokers                                                                                                                                                                                                                                                                                                                                                                                                            | n=112 sPTB, n=112 term                                            | maternal fetal serum tissue ebak at the University of Iowa                                                                                                                                                     | 2009-2010  | serum       | reprosource AMH assay                                            | 15-20 weeks                 | sPTB <37 weeks                                | case-control | USA        | anti-mullerian hormone AMH adjusted for AFP                                                                                                                                                                                                                                                                                                                                                                                                                                                                                                                                                                                                                                                                                                                                           | Y | second trimester AMH was not associated with PTB, but was associated with adjusted for AFP and maternal weight change between the 1st and 2nd trimesters | no fetal sex specific interactions were observed; addition of history of PTB did not affect models                                                                        |
| 80 | Cell Reports Medicine                           | Tarca et al.    | 2021 | conduct a metagenomic study to develop predictive models of sPTB                                                                                                                                                         | transcriptomic: mean age 25, 94% african american, 29% nulliparous, preterms were more likely to have a history of PTB<br>proteomic: mean age 24, 91% african american, 524 nulliparous, preterms were more likely to have a history of PTB                                                                                                                                                                                                             | n=34 sPTB, n=65 TB (transcriptome), n=62 sPTB, n=39 TB (proteome) | longitudinal study at the Center for Advanced Obstetrical Care and Research of the Perinatology Research Branch, the NICHD/NIH/DHHS, the Detroit Medical Center, the Wayne State University School of medicine | not stated | whole blood | microarray (transcriptome)<br>SOMAmmer aptamer based (proteomic) | <33 weeks                   | sPTB <37 weeks                                | case-control | USA/Canada | 50 genes used to predict (but not all listed):<br>AGEL, PDK1, LAGL, HAVR2, IL6, FCER2, CADM1, PLAU, IMPDH2, PRDX6, PAK2A, F2, PPIE, GSD2, NAPA, PDK1, MGE8, ANKPT1, CAM2A                                                                                                                                                                                                                                                                                                                                                                                                                                                                                                                                                                                                             | Y | RNA is differentially expressed in PPRM<br>claims across two cohorts. Proteomic profiles predict sPTB better than gene expression                        | addition of cases with PPRM to those with sPTB did not affect predictive performance of proteomic model                                                                   |
| 81 | Journal of Pregnancy                            | Tripathi et al. | 2014 | evaluate the role of biomarkers and cervical length in prediction of preterm labour in asymptomatic low risk women in an Indian population                                                                               | women at low risk of PTB, mean BMI 22, nulliparity around 60, primarily non smokers                                                                                                                                                                                                                                                                                                                                                                     | n=137 sPTB, n=137 TB                                              | tertiary care teaching hospital                                                                                                                                                                                | not stated | serum       | EUSA                                                             | 24-27 weeks                 | sPTB <35 weeks                                | case-control | India      | G-CSF<br>AFP<br>ferritin<br>IL6<br>IL8<br>alkaline phosphatase<br>cervical IGFBP-1, AFP, G-CSF, alkaline phosphatase, IL-6, cervical length                                                                                                                                                                                                                                                                                                                                                                                                                                                                                                                                                                                                                                           | Y | alkaline phosphatase and ferritin was associated with preterm delivery but had poor predictive value                                                     | na                                                                                                                                                                        |
| 82 | American Journal of Obstetrics and Gynaecology  | Vogel et al.    | 2006 | evaluate the relationship between serum concentrations of retelin and sCD163 with cervical length and preterm delivery in women with previous sPTB                                                                       | women with at least 1 late spontaneous miscarriage or early sPTB between 16 and 30 weeks, median age 24, median prepregnancy weight 63 kg, median height 165, median BMI 24, 84% black race, 26% greater than 1 previous PTB, 13% smoking in pregnancy, 87% unmarried, participants with PTD <37 weeks were more likely to be black                                                                                                                     | n=61                                                              | University of Alabama at Birmingham                                                                                                                                                                            | 1995-1996  | serum       | EUSA                                                             | 12-25 weeks                 | sPTB <37, <35, <32 weeks with or without PPRM | cohort       | Denmark    | retelin<br>sCD163                                                                                                                                                                                                                                                                                                                                                                                                                                                                                                                                                                                                                                                                                                                                                                     | Y | retelin and sCD163 were not correlated with sPTB                                                                                                         | C                                                                                                                                                                         |
| 83 | Journal of Reproductive Immunology              | Vogel et al.    | 2007 | analyze the association between serum and cervicovaginal inflammatory markers and recurrent sPTB in women with prior early PTB                                                                                           | women with at least 1 prior spontaneous PTB between 16 and 30 weeks, median age 24, median prepregnancy weight 63 kg, median height 165 cm, median BMI 24, 84% african american, 26% greater than 1 previous PTB, 13% smoking in pregnancy, 87% unmarried                                                                                                                                                                                               | n=62                                                              | University of Alabama at Birmingham                                                                                                                                                                            | not stated | serum       | multiplex bead based assay                                       | 12-25 weeks                 | sPTB <35, <37 weeks                           | cohort       | Denmark    | IL1B<br>IL2<br>IL4<br>IL5<br>IL6<br>IL8<br>IL10<br>IL12<br>IL17<br>IL18<br>IL33<br>TNF $\alpha$<br>MMP-9<br>TGF- $\beta$ 1<br>sTNF R1<br>GM-CSF<br>IL-6RA<br>TREM-1<br>TNF $\alpha$ , cervical IL-6 and cervical length                                                                                                                                                                                                                                                                                                                                                                                                                                                                                                                                                               | Y | cervicovaginal sCD163 and cervical length predicted 69% of PTB, 5% false positive, multiple inflammatory markers were associated with sPTB               | stratifying data based on cervical length did not significantly affect prediction results; inflammatory markers were predictors of PTB in women with long cervical length |
| 84 | Journal of Women's Health                       | Whitcomb et al. | 2009 | evaluate the association between maternal serum G-CSF in the first and second trimesters and PTB                                                                                                                         | mean age 25, 43% smoking at time of presentation for prenatal care, 20% infection in pregnancy, 71% white, 24% black, preterms were more likely to be non white, to smoke, and to have an infection in pregnancy, but not significant                                                                                                                                                                                                                   | n=31 sPTB, n=394 TB                                               | Collaborative Perinatal Project                                                                                                                                                                                | 1959-1974  | serum       | multiplex fluorokine (EUSA based)                                | first and second trimesters | sPTB <37 weeks                                | case-control | USA        | G-CSF                                                                                                                                                                                                                                                                                                                                                                                                                                                                                                                                                                                                                                                                                                                                                                                 | Y | G-CSF was significantly associated with gestational age at birth and PTB                                                                                 | estimates were not substantially altered when considering previous PTB as a risk factor. Mean G-CSF was higher among PTB <33 weeks compared to all PTB                    |
| 85 | PloS ONE                                        | Winger et al.   | 2020 | predict sPTB among pregnant women in an African American population using first trimester peripheral blood maternal immune cell microRNA                                                                                 | black women with singleton pregnancies and maternal BMI <30, mean age 23, mean BMI 25, 46% nulliparous, 13% prior PTB, 68% prior spontaneous abortion, 15% smoking, preterms were more likely to have had a prior PTB                                                                                                                                                                                                                                   | n=18 sPTB, n=139 TB                                               | Center for Advanced Obstetrical Care and Research of the Perinatology Research Branch                                                                                                                          | 2006-2016  | blood       | rt-qPCR                                                          | 6-12 weeks                  | sPTB <35 weeks                                | case-control | USA        | hsa_miR_221_3p, hsa_miR_33a_5p, hsa_miR_6752_3p, hsa_miR_1244, miR-miR_348a_3p<br>hsa_miR_1_3a, hsa_miR_1_3b, hsa_miR_1267, hsa_miR_233_5p, hsa_miR_199b_5p,<br>hsa_miR_1320, miR-miR_141_3p, hsa_miR_4485_5p, hsa_miR_342_5p, hsa_miR_132_3p, hsa_miR_132_3p, hsa_miR_219_5p<br>hsa_miR_424_5p, hsa_miR_221_5p, hsa_miR_1237_3p, hsa_miR_105b_5p, hsa_miR335_5p, hsa_miR5001_5p, hsa_miR_578, hsa_miR_6889_3p, hsa_miR_306_5p, hsa_miR146a_5, hsa_miR_146a_5p, hsa_miR_30a_3p, hsa_miR_5103_3p, hsa_miR_582_5p, hsa_miR_671_5p, hsa_miR_7_5p, hsa_miR_1229_5p, hsa_miR_6819_3p, hsa_miR_196a_5p, hsa_miR_210_5p, hsa_miR_1238_3p, hsa_miR_6737_3p, hsa_miR_193a_3p, hsa_miR_223_3p, hsa_miR_181a_5p, hsa_miR_210_3p, hsa_miR_24_1_5p, hsa_miR_6737_3p, hsa_miR_511_5p, hsa_miR_16_5p | Y | miRNA panel predicted in test set with AUC 0.80, sensitivity 0.89 and specificity 0.73                                                                   | na                                                                                                                                                                        |
| 86 | PloS ONE                                        | Wommack et al.  | 2018 | determine association between microRNA clusters and PTB and infant birth outcomes                                                                                                                                        | Hispanic women between the ages of 18 and 39, born in the US or had lived in the US for 10 or more years, covered by self-pay, state funded or private insurance, no use of steroids or antidepressants 1 month prior to enrollment, mean age 26, mean prepregnancy BMI 25, 5% cotine positive, 24% history of PTB                                                                                                                                      | n=21 sPTB, n=21 TB                                                | Hispanic women recruited at two obstetrical clinics in Houston metropolitan area                                                                                                                               | 2008-2012  | plasma      | miRCURY LNA universal RT microRNA PCR panel                      | 22-24 weeks                 | sPTB <37 weeks                                | case-control | USA        | hsa_miR_127-3p<br>hsa_miR_136_5p<br>hsa_miR_543                                                                                                                                                                                                                                                                                                                                                                                                                                                                                                                                                                                                                                                                                                                                       | Y | groups of miRNAs from common chromosomal clusters, not individual miRNAs are associated with length of gestation and PTB                                 | na                                                                                                                                                                        |
| 87 | Reproductive Sciences                           | Zhou et al.     | 2020 | examine sPTB in relation to maternal blood mRNA levels of previously identified genes associated with sPTB                                                                                                               | primarily caucasian, mean age 31, mean BMI 25, approx 15% smoking during pregnancy, approx half nulliparous                                                                                                                                                                                                                                                                                                                                             | n=51 sPTB, n=106 TB                                               | public gene expression dataset from the All Our Families cohort in Calgary, Canada                                                                                                                             | 2008-2010  | blood       | Affymetrix microarray                                            | TM1 and TM2                 | sPTB <37 weeks                                | case-control | Canada     | EBF1<br>EFFECF<br>ANGT2<br>HNF1A<br>ADCV5<br>RAP2C                                                                                                                                                                                                                                                                                                                                                                                                                                                                                                                                                                                                                                                                                                                                    | Y | women in the lowest quartile of EBF1 odds of sPTB was 2.86, no other candidate genes were significantly associated with sPTB                             | similar predictions for sPTB participants with and without PPRM                                                                                                           |
| 88 | Clinica Chimica Acta                            | Zhu et al.      | 2018 | assess the relationship between maternal early pregnancy plasma concentrations of macrophage inhibitor factor (MIF) and sPTB                                                                                             | no abortions or fetal demise all primigravidae, primarily Han Chinese, median age 28, median prepregnancy BMI 24, 13% smoking at study entry, 7% alcohol consumption in first trimester, 94% married, 20% high school or less education, 12% genitourinary infection during pregnancy, 49% "rural" (socio-professional) category, preterms were more likely to be older, have a higher prepregnancy BMI, smoke, and have lower physical activity levels | n=596                                                             | first time pregnancies attending first prenatal visit                                                                                                                                                          | 2016       | plasma      | EUSA                                                             | <14 weeks                   | sPTB <37 weeks                                | cohort       | China      | MIF<br>CRP<br>IL6                                                                                                                                                                                                                                                                                                                                                                                                                                                                                                                                                                                                                                                                                                                                                                     | Y | MIF was higher in sPTB compared to term, lnMIF increase associated with increased 12% odds of sPTB and improved discriminatory over BMI, CRP and IL-6    | na                                                                                                                                                                        |
